# Supplementary material for: Borane and alane reductions of bulky N,N′-diaryl-1,3-diimines: structural characterization of products and intermediates in the diastereoselective synthesis of 1,3-diamines
Source: Royal Society of Chemistry journal article supplement (doi:10.1039/b306401h), 2003-01-01
Supplement: b306401h.doc [file b306401h.doc]

Supplementary Material: Preparative and Characterization Details

for

**Borane and alane reductions of bulky** N,N’**-diaryl-1,3-diimines: Structural characterization of products and intermediates in the diastereoselective synthesis of 1,3 diamines.**

by

David T. Carey, Francis S. Mair,* Robin G. Pritchard,John E. Warren and Rebecca J. Woods.

1,3-(2-isopropylphenyl)-4,5,5,6-tetramethyl-1,3,2-diazaborinane, **2b**:

Diborane was generated *in situ* after a literature method:11 MeI (0.61 ml, 9.76 mmol) was added dropwise to a solution of **1b** (1.77 g, 4.88 mmol) and (Bu)4NBH4 (1.50 g, 5.86 mmol) in dichloromethane (40 ml) at 0 oC. The colourless solution effervesced on addition of MeI. The solution was left to stir under an argon stream for 6 h. Subsequently aqueous NaOH (20 ml, 3M) was added dropwise to the solution which was then left to stir for 2 h. The organic layer was separated and dried under reduced pressure. An aqueous NaOH/hexane extraction was then carried out; the hexane fraction was dried with anhydrous MgSO4 and the solvent was removed under reduced pressure to yield a white solid, 1,3-(2-isopropylphenyl)-4,5,5,6-tetramethyl-1,3,2-diazaborinane, **2b**. The solid was recrystallised from methanol. M.p.: 92-94 oC. Yield: 5.63 g, 81 %. The 1H nmr spectrum in toluene-d8 showed significant line broadening at 22 oC. Peaks sharpened when the temperature was increased to 80 oC. 1H nmr (400MHz; toluene-d8; 80 oC):  0.98 (6H, d, 3JHH = 6.5 Hz, NCH*Me*C(Me)2CH*Me*N); 1.06 (6H, s, NCHMeC(*Me*)2CHMeN); 1.22 (6H, d, 3JHH = 6.5 Hz, *Me*CHMe); 1.25 (6H, d, 3JHH = 6.5 Hz, MeCH*Me*); 3.3 (2H, bq, 3JHH = 6.5 Hz, NC*H*MeC(Me)2C*H*MeN); 3.5 (1H, 1:1:1:1 q, 1JBH = 145 Hz, B*H*); 3.58 (2H, septet, 3JHH = 6.5 Hz, C*H*(Me)2); 6.97-7.12 and 7.18-7.23 (8H, non-first order m, aromatic protons). 13C nmr (75 MHz; CDCl3; 22 oC):  16.0 (NCH*Me*C(Me)2CH*Me*N); 24.8 (apparent broad singlet, CH(*Me*)2); 27.4 (apparent broad singlet, *C*H(Me)2); 37.7 (NCHMe*C*(Me)2CHMeN); 126.1 (apparent broad singlet, aromatic carbons). 11B nmr (64 MHz; CDCl3; 1H decoupled):  27.5 (bs, *B*-H). Elemental analysis, Calcd. for C25H37N2B: C, 79.8 %; H, 9.8 %, N, 7.4 %; B, 2.9 %. Found: C, 79.8 %; H, 9.8 %; N, 7.4 %; B, 2.9 %. IR: 3064 cm-1 (s, (aromatic C-H)); 2868, 2935 and 2970 cm-1 (overlapping broad singlets, aliphatic asym/sym C-H stretches); 2526 cm-1 (bs, (B-H)); 1490 cm-1 (s, (B-N)); 1480-1430 cm-1 (aliphatic asym C-H bends).

N,N’-bis-(2-isopropylphenyl)-3,3’-dimethylpentane-2,4-diamine, 3b,

A solution of the 1,3,2-diazaborinane (1.30 g) in THF (20 ml) was stirred with HCl (1 M, 20 ml) overnight. The mixture was then neutralised using aqueous NaOH (1 M) and THF was removed under reduced pressure. A water/hexane extraction was carried out and the organic phase was reduced to dryness to give (iPrH)(Me2)b-diamine as a white solid. Large, colourless crystals were grown by slow evaporation from methanol. M.p.: 48–50 oC. Yield: 1.21 g, 96 %. 1H nmr (300MHz; CDCl3):  1.11 (6H, d, 3JHH = 6.8 Hz, *Me*CHMe); 1.12 (6H, bs, NCHMeC(*Me*)2CHMeN); 1.18 (6H, d, 3JHH = 6.4 Hz, NCH*Me*C(Me)2CH*Me*N); 1.26 (6H, d, 3JHH = 6.8 Hz, MeCH*Me*); 2.79 (2H, septet, 3JHH = 6.8 Hz, MeC*H*Me); 3.76 (2H, two just-resolved quartets, 3JHH = 6.4 Hz, NC*H*MeC(Me)2C*H*MeN); 4.28 (2H, bd, N*H*); 6.67-6.75 and 7.02-7.16 (8H, non-first order m, aromatic protons). 13C nmr (75 MHz; CDCl3):  15.8 (NCH*Me*C(Me)2CH*Me*N); 22.3 (NCHMeC(*Me*)2CHMeN); 22.5 and 23.0 (CH(*Me*)2); 27.7 (C*H*(Me)2); 40.7 (NCHMe*C*(Me)2CHMeN); 55.3 (N*C*HMeC(Me)2*C*HMeN); 112.0, 117.4, 125.4 and 127.1 (aromatic carbons); 133.2 (*C*-N, aromatic C); 144.9 (*C*(CH(Me)2), aromatic C). Low temperature ( -80 oC) 1H NMR spectra were recorded in d8-toluene. Elemental analysis, Calcd. for C25H38N2: C, 81.9 %; H, 10.4 %, N, 7.6 %. Found: C, 82.1 %; H, 10.5 %; N, 7.8 %. IR: 3370 cm-1 (s, (N-H )); 1604 cm-1 (s, N-H bend); 1301 cm-1 (s, (C-N)).

An alternative method using commercial borane: BH3.THF (34.8 ml of a 1.0 M THF solution, 34.8 mmol) was added dropwise to a solution of 1b (10.55 g, 29.0 mmol) in THF (50 ml) at 0 oC. The solution was stirred for 2 h at 0 oC, then warmed to 22 oC and left to stir overnight. Water (30 ml) was added dropwise to the solution and the resulting mixture was stirred for 1 h. The solvent was removed under reduced pressure from the mixture and a water/hexane extraction was carried out. A colourless oil was obtained by concentration of the hexane fraction, 1,3-(2-isopropylphenyl)-4,5,5,6-tetramethyl-1,3,2-diazaborinane, 2b. To obtain the free diimine 3b, an acidic workup (described in method 1) was used. Yield: 9.17 g, 86 %.

1,3-(2,6-diisopropylphenyl)-4,5,5,6-tetramethyl-1,3,2-diazaborinane, 2a:

Using the same experimental procedure used to reduce 1b, 1a was reduced using B2H6 prepared *in situ* (diimine:BH3 molar ratio = 1:1.2). The colourless oil obtained was recrystallised from methanol to yield 1,3-(2,6-diisopropylphenyl)-4,5,5,6-tetramethyl-1,3,2-diazaborinane, 2a. M.p.: 174-176 oC. Yield: 1.54 g, 86 %. 1H nmr (300MHz; CDCl3):  0.89 (6H, d, 3JHH = 6.4 Hz, NCH*Me*C(Me)2CH*Me*N); 1.05 (6H, d, 3JHH = 6.8 Hz, CH(*Me*)2); 1.19 (6H, d, 3JHH = 6.8 Hz, CH(*Me*)2); 1.22 (6H, bs, NCHMeC(*Me*)2CHMeN); 1.27 (6H, d, 3JHH = 6.8 Hz, CH(*Me*)2); 1.33 (6H, d, 3JHH = 6.8 Hz, CH(*Me*)2); 3.30 (2H, bq, 3JHH = 6.4 Hz, NC*H*MeC(Me)2C*H*MeN); 3.53 and 3.54 (2H + 2H, two just-resolved septets, 3JHH = 6.8 Hz and 3JHH = 6.8 Hz, C*H*(Me)2); 7.11-7.25 (6H, non-first order m, aromatic protons); B*H* not observed. 13C nmr (75 MHz; CDCl3):  15.5 (NCH*Me*C(Me)2CH*Me*N); 23.9 and 25.6 (CH(*Me*)2); 26.1 (NCHMeC(*Me*)2CHMeN); 28.1 and 28.3 (*C*H(Me)2); 38.3 (NCHMe*C*(Me)2CHMeN); 61.5 (N*C*HMeC(Me)2*C*HMeN); 123.7 and 124.0 (aromatic C, *meta* position); 126.3 (aromatic C, *para* position); 142.9, 147.5 and 148.1 (*C*(CHMe2) and *C*-NH, aromatic carbons). 11B nmr (64 MHz, CDCl3, 1H decoupled):  27.7 (bs, *B*-H). Elemental analysis, Calcd. for C31H49N2B: C, 80.8 %; H, 10.7 %, N, 6.1 %. Found: C, 80.5 %; H, 10.9 %; N, 6.1 %. IR: 3060 cm-1 (s, (aromatic C-H); 2868, 2930 and 2970 cm-1 (overlapping broad singlets, aliphatic asym/sym C-H stretches); 2493 cm-1 (bs, (B-H)); 1490 cm-1 (s, (B-N)); 1470-1420 cm-1 (aliphatic asym C-H bends).

2a was also prepared from 1a using BH3.THF (diimine:BH3 molar ratio = 1:1.2), as for 2b. Yield of 2a using BH3.THF: 82 %.

The 1,3,2-diazaborinane **2a** was stable to hydrolysis when heated under reflux in THF with 1M HCl for 16 h, and when heated under reflux with H2O2 (27 % w/w aqueous solution) and KOH in ethanol for 4 h.

2-(2,6-diisopropyl)phenylamino-4-(2,6-diisopropyl)phenylimino-3,3-dimethyl-pentane, **4**:

A mixture of AlCl3 (0.22 g, 1.68 mmol) and LiAlH4 (0.19 g, 5.04 mmol) in diethyl ether (40 ml) was stirred for 15 mins at –70 oC. A solution of 1a (2.00 g, 4.48 mmol) in diethyl ether (10 ml) was then added dropwise to the cooled mixture, which was stirred for 3 h at –70 oC, then gradually warmed to 22 oC and left to stir overnight. Following dropwise addition of water (10mL) and filtration, the organic phase of the filtrate was isolated, dried over anhydrous MgSO4 and the solvent removed under reduced pressure to yield a colourless oil. The 1H nmr of the crude product contained peaks due to a major product, 4, and starting material 1a in the approximate ratio 3:1. Upon dissolution of the oil and crystallisation from methanol at –25 oC, a white crystalline solid, pure 2-(2,6-diisopropyl)phenylamino-4-(2,6-diisopropyl)phenylimino-3,3-dimethyl-pentane, 4, was obtained. M.p.: 57-59 oC. Yield: 1.41 g, 70 %. 1H nmr (300MHz; CDCl3):  0.97 (3H, d, 3JHH = 6.4 Hz, NCMeC(Me)2CH*Me*N); 1.10 (6H, d, 3JHH = 6.8 Hz, amine *Me*CHMe); 1.17 (3H, d, 3JHH = 6.8 Hz, imine *Me*CHMe); 1.18 (3H, d, 3JHH = 6.8 Hz, imine *Me*CHMe); 1.2 (3H+3H, two d overlapped, 3JHH = 6.8 Hz, imine MeCH*Me*); 1.23 (6H, d, 3JHH = 6.8 Hz, amine MeCH*Me*); 1.44 (3H, s, NCMeC*Me*MeCHMeN); 1.45 (3H, s, NCMeCMe*Me*CHMeN); 1.78 (3H, s, NC*Me*C(Me)2CHMeN); 2.78 (1H, septet, 3JHH = 6.8 Hz, imine MeC*H*Me); 2.90 (1H, septet, 3JHH = 6.8 Hz, imine MeC*H*Me); 3.35 (2H, septet, 3JHH = 6.8 Hz, amine MeC*H*Me); 3.6 (1H, bq, NCMeC(Me)2C*H*MeN); 3.9 (1H, bs, N*H*); 6.99-7.16 (6H, non-first order m, aromatic protons). 13C nmr (75 MHz; CDCl3):  14.6 (NCMeC(Me)2CH*Me*N); 17.0 (NC*Me*C(Me)2CHMeN); 22.6 (NCMeC(*Me*Me)CHMeN); 23.4, 23.5, 23.9 and 24.5 (imine CH(*Me*)2); 24.1 and 24.6 (amine (CH(*Me*)2); 24.5 (NCMeC(Me*Me*)CHMeN); 28.1 (amine (C*H*(Me)2); 28.2 and 28.3 (imine (C*H*(Me)2); 48.5 (NCHMe*C*(Me)2CHMeN); 60.7 (NCMeC(Me)2*C*HMeN); 123.1, 123.2, 123.3, 123.4 and 123.7 (aromatic *C*H); 133.2 (*C*-N, aromatic C); 136.3 and 136.7 (imine aromatic *C*Pri2); 142.1 (amine *C*-N, aromatic C); 142.8 (amine aromatic (*C*Pri2); 146.6 (imine *C*-N, aromatic C); 176.2 (N*C*HMeC(Me)2CHMeN). 1D 1H NOE NMR spectra of 2-(2,6-diisopropyl)phenylamino-4-(2,6-diisopropyl)phenylimino-3,3-dimethyl-pentane in CDCl3 were also recorded; see discussion. Elemental analysis, Calcd. for C31H48N2: C, 83.0 %; H, 10.8 %, N, 6.2 %. Found: C, 83.0 %; H, 11.0 %; N, 6.3 %. IR: 3341 cm-1 (s, (N-H)); bend); 1648 cm-1 (s, (C=N)); 1326 cm-1 (s, (C-N)).

*N,N’*-bis-(2,6-diisopropylphenyl)-3,3’-dimethylpentane-2,4-diamine, 3a, and aluminium intermediate, 5

Method 1: A mixture of AlCl3 (0.12 g, 0.88 mmol) and LiAlH4 (0.10 g, 2.63 mmol) in diethyl ether (40 ml) was stirred for 1 h at –10 oC. A solution of **4** (1.05 g, 2.34 mmol) in diethyl ether (10 ml) was then added dropwise to the cooled mixture. The mixture was stirred for 3 h at –10 oC and then gradually warmed to 22 oC and left to stir overnight. A 5 ml aliquot of the reaction mixture was removed for analysis and stored under anhydrous conditions, see below for **5**. The remaining reaction mixture was hydrolysed with water (10 ml) and the organic product, a white solid, (iPr2)(Me2)b-diamine, was isolated using the same procedure employed to isolate **4**. See method 2 for (iPr2)(Me2)b-diamine characterisation data, yield: 0.85 g, 81 %.

The aliquot removed from the reaction mixture was filtered and the solvent removed under reduced pressure. The colourless oil obtained was dissolved in hexane (2 ml). A small quantity of colourless crystals were grown from the hexane solution at –4 oC. The 1H NMR spectrum (400MHz; C6D6) of the crystals was very complex. Elemental analysis, Calcd. for C31H50N2AlCl/C31H51N2Al (38:62): C, 75.8 %; H, 10.4 %, N, 5.7 %; Al, 5.7 %. Found: C, 73.0 %; H, 12.8 %; N, 5.4 %; Al, 5.1 %, some hydrolysis had occurred, but single-crystal analysis confirmed the composition of 5.

Method 2: The same procedure outlined in method 1 was used, but on this occasion the reaction was carried out at –10 oC, and a smaller excess of AlH3 was used (1a:AlH3 molar ratio = 1:1.2). A white solid, 3a, was obtained from the water/ether extraction. Large cuboidal crystals were obtained by slow evaporation of a methanol solution of the diamine. M.p.: 95-97 oC. Yield: 1.70 g, 85%. 1H nmr (300MHz; CDCl3):  0.95 (6H, d, 3JHH = 6.8 Hz, NCH*Me*C(Me)2CH*Me*N); 1.02 (3H, s, NCHMeC(*Me*Me)CHMeN); 1.21 (12H, d, 3JHH = 6.8 Hz, *Me*CHMe); 1.25 (12H, d, 3JHH = 6.8 Hz, MeCH*Me*); 1.37 (3H, s, NCHMeC(Me*Me*)CHMeN); 3.13 (2H, bs, N*H*); 3.29 (4H, septet, 3JHH = 6.8 Hz, MeC*H*Me); 3.61 (2H, q, 3JHH = 6.8 Hz, NC*H*MeC(Me)2C*H*MeN); 6.99-7.12 (6H, non-first order m, aromatic protons). 13C nmr (75 MHz; CDCl3):  14.6 (NCH*Me*C(Me)2CH*Me*N); 18.7 and 20.4 (NCHMeC(*Me*)2CHMeN); 24.1 and 24.6 (CH(*Me*)2); 28.2 (*C*H(Me)2); 42.4 (NCHMe*C*(Me)2CHMeN); 58.6 (N*C*HMeC(Me)2*C*HMeN); 122.8 (aromatic C, *para*); 123.8 (aromatic C, *meta*); 142.2 and 142.3 (*C*-N, aromatic C and (*C*(CH(Me)2). Elemental analysis, Calcd. for C31H50N2: C, 82.6 %; H, 11.2 %, N, 6.2 %. Found: C, 82.5 %; H, 11.1 %; N, 6.2 %. IR: 3414 cm-1 (s, (N-H )); 1590 cm-1 (s, N-H bend); 1306 cm-1 (s, (C-N)).
