# Supplementary figures and images for: Borane and alane reductions of bulky N,N′-diaryl-1,3-diimines: structural characterization of products and intermediates in the diastereoselective synthesis of 1,3-diamines
Source: Royal Society of Chemistry journal article supplement (doi:10.1039/b306401h), 2003-01-01

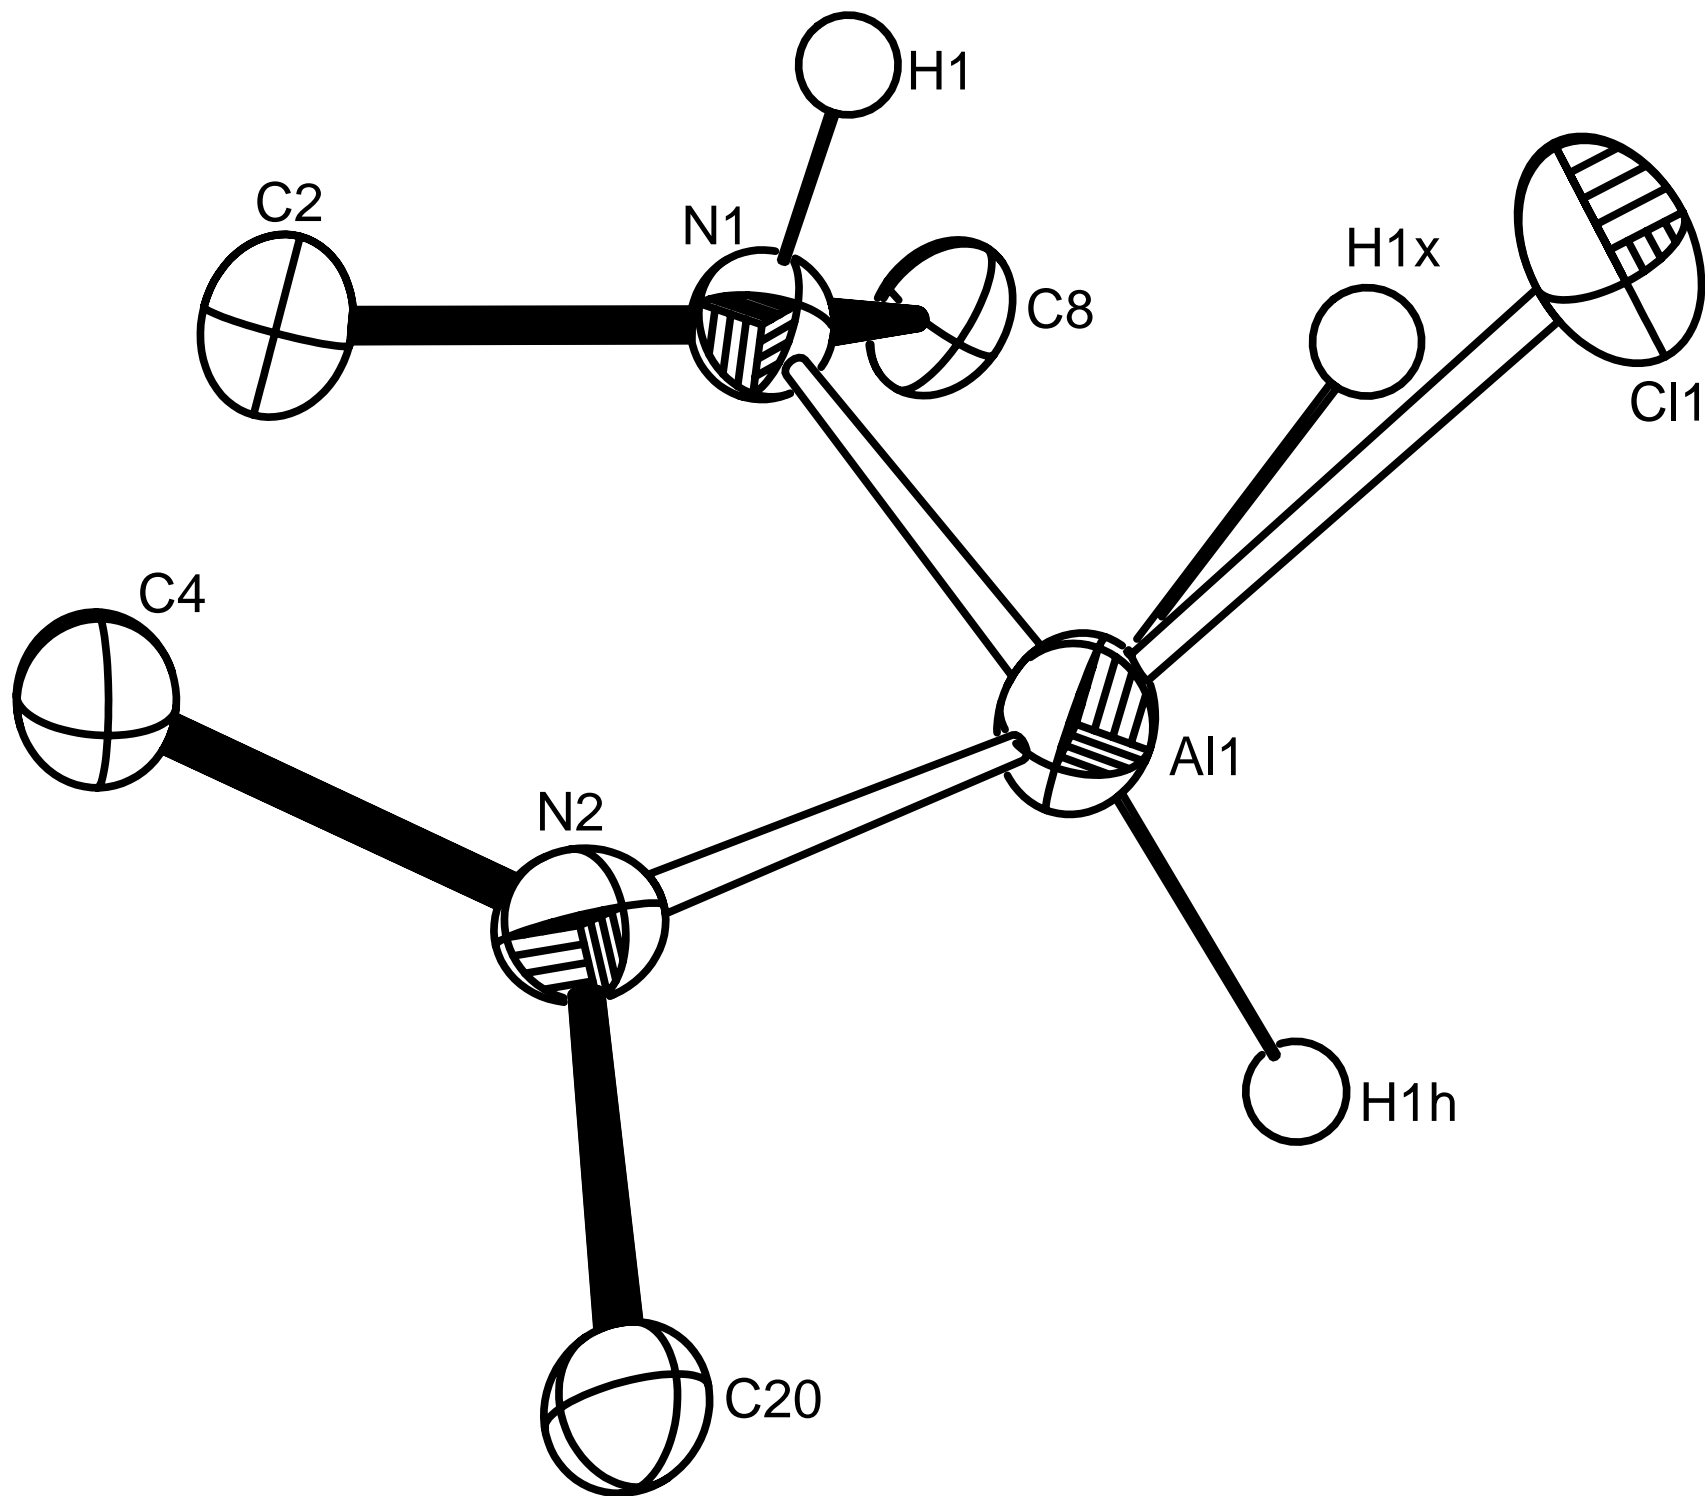

Supplement: b306401h.pdf [file b306401h.pdf]
